# Supplementary material
Source: MDPI journal article supplement (https://www.mdpi.com/2673-3994/3/4/38)
Supplement: s1 [file s1]

**Energy Recovery Potential from Effluents in the Process Industry: System  
Dynamics Modeling and Techno-economic Assessments**

## Supplementary Materials

### I

#### Energy Recovery from Biogas Model Documentation

ac1=

60.1

Units: Nm<sup>3</sup>/gVS

ac2=

111.5

Units: Nm<sup>3</sup>/gVS

Acetogenesis and Methanogenesis= INTEG (  
(hydrolyzable carbon-CH<sub>4</sub>-CO<sub>2</sub>-"CO<sub>2</sub>\*")\*T,  
0)

Units: Nm<sup>3</sup>/gVS

alpha=

0.839

Units: Nm<sup>3</sup>/gVS

Am=

257.2

Units: Nm<sup>3</sup>/gVS

batch time=

10

Units: Day

capacity factor=

0.8

Units: Dmnl

CH<sub>4</sub>=

DELAY3(Acetogenesis and Methanogenesis/(Am\*Km), batch time)

Units: Nm<sup>3</sup>/gVS

CO<sub>2</sub>=

Hydrolysis and Acidogenesis/(kc1\*ac1)

Units: Nm<sup>3</sup>/gVS

"CO<sub>2</sub>\*"=

Acetogenesis and Methanogenesis/(kc1\*(ac1+ac2))

Units: Nm<sup>3</sup>/gVS

concentration of methane=

60

Units: Dmnl

daily total biogas production=

$\text{CH}_4 + \text{CO}_2$

Units: Nm<sup>3</sup>/gVS

effluent from beer production=

4805.77

Units: m<sup>3</sup>/Day

Effluents: Cassava - 9554 Sugar - 2767 Beer - 4805.77

effluent from cassava flakes production=

9554

Units: m<sup>3</sup>/Day

Effluents: Cassava - 9554 Sugar - 2767 Beer - 4805.77

effluent from sugar production=

2767

Units: m<sup>3</sup>/Day

Effluents: Cassava - 9554 Sugar - 2767 Beer - 4805.77

effluents in=

(effluent from beer production+effluent from cassava flakes production +effluent from sugar production

)\*(initial solid carbon

)\*k\*Time

Units: m<sup>3</sup>

electrical energy potential=

(capacity factor\*hours of operation\*power generation potential)/(electrical Energy unit adjustment

)

Units: GWh/Day

electrical Energy unit adjustment=

$10^6$

Units: KW/GWh

electricity Efficiency Energy Conversion=

33

Units: KW/MJ

heat Energy Unit Adjustment=

1

Units: Day/m<sup>3</sup>

heat generation potential=

((lower calorific value of methane\*capacity factor\*thermal Efficiency Energy Conversion \*daily total biogas production\*purification rate)/(heat Energy Unit Adjustment\* $10^6$ ))

Units: GWh/Day

hours of operation=

24

Units: 1/Day

Hydrolysis and Acidogenesis= INTEG (  
 ((alpha\*effluents in\*unit Adjustment)-(CO2-hydrolyzable carbon))\*T,  
 0.588\*0.1\*0.6)

Units: Nm3/gVS

hydrolyzable carbon=  
 Hydrolysis and Acidogenesis\*kh

Units: Nm3/gVS

initial solid carbon=  
 0.588\*0.1\*0.6

Units: m3

k=  
 0.1

Units: 1/m3

kc1=  
 0.18

Units: gVS/Nm3

kh=  
 0.22

Units: Dmnl

Km=  
 0.039

Units: gVS/Nm3

lower calorific value of methane=  
 5.5

Units: KWh/m3

lower Heating Value of methane=  
 35.5

Units: MJ/m3

power generation potential=  
 (lower Heating Value of methane\*electricity Efficiency Energy Conversion\*daily total  
 biogas production  
 \*concentration of methane  
 \*purification rate)/power unit adjustment

Units: KW

power unit adjustment=  
 31536

Units: 1/m3

purification rate=  
 0.9

Units: gVS/Nm<sup>3</sup>

T=

1

Units: 1/Day

Conversion factor

thermal Efficiency Energy Conversion=

45

Units: GWh/KWh

unit Adjustment=

1

Units: 1/m<sup>3</sup>

## II

Table S1. Life cycle Assessment of generated effluents

|                                                                | <b>Beer Effluent</b> | <b>Cassava Effluent</b> | <b>Sugar Effluent</b> |
|----------------------------------------------------------------|----------------------|-------------------------|-----------------------|
| <b>Average Electricity generation potential /day (GWh/day)</b> | 0.03                 | 0.05                    | 0.02                  |
| <b>Electricity generation potential/year (GWh/yr)</b>          | 7.74                 | 15.3902                 | 4.4576                |
| <b>Emission avoided (tCO<sub>2</sub>eq/yr)</b>                 | 3068.30              | 6099.644137             | 1766.693981           |
| <b>LCA (tCO<sub>2</sub> eq)</b>                                | 76707.48             | 152491.1034             | 44167.34952           |
|                                                                |                      |                         |                       |
| <b>Average Heat generation potential/day (GWh/day)</b>         | 0.127925             | 0.254311                | 0.073658              |
| <b>Heat generation potential /year (GWh/yr)</b>                | 35.819               | 71.20708                | 20.62424              |
| <b>Emission avoided (tCO<sub>2</sub>eq/yr)</b>                 | 14196.25173          | 28221.71564             | 8174.066912           |
| <b>LCA (tCO<sub>2</sub> eq)</b>                                | 354906.2932          | 705542.8909             | 204351.6728           |
| <b>Total Avoided Emissions/Year</b>                            | 17,264.55            | 34,321.36               | 9,940.76              |

## III

**Table S2. Cost and Revenue generated as well as Levelised cost of Electricity for Reciprocating Internal Combustion engine – (CHP system)**

Price of 1USD @ 500₦

|                                              | Item description                     | Estimated Unit cost (\$)        | Estimated cost (\$) |
|----------------------------------------------|--------------------------------------|---------------------------------|---------------------|
| Investment cost                              | Cryogenic equipment                  |                                 | 70,000.00           |
|                                              | CHP system (reciprocating IC engine) |                                 | 10,400,000.00       |
|                                              | Land cost and site construction      |                                 | 30,000.00           |
|                                              | storage tank farm                    |                                 | 200,000.00          |
|                                              | labor (skilled and Unskilled)        | 10,000                          | 2,000,000.00        |
|                                              | Stainless steel 9.6 m3 tanks         | 2,000                           | 2,000,000.00        |
|                                              | Different sizes of connecting tubes  | 2.00                            | 2,000.00            |
|                                              | Different sizes of valves            | 10.00                           | 1,000,000.00        |
|                                              |                                      |                                 |                     |
| Total Investment cost                        |                                      |                                 | 15,900,000.00       |
| Annual O & M for AD                          |                                      |                                 | 87,500.00           |
| Annual Operating and maintenance cost of CHP |                                      |                                 | 311,098.54          |
| Total cost                                   |                                      |                                 | 16,298,598.54       |
| Salvage Cost                                 |                                      |                                 | 1,000,000.00        |
|                                              |                                      |                                 |                     |
| Potential Revenue from Electricity Generated | 28.28                                | 1,032,179.13                    |                     |
|                                              | (GWh/yr)                             | Price of electricity @ 0.05/kWh |                     |
| Potential Revenue from Heat Generated        | 130.85                               | 6,631,084.45                    |                     |
|                                              |                                      | Price of LPG @ 1.25/kg          |                     |
|                                              |                                      | Price of Heat @ NGN0.08/kWh     |                     |
| Annual Revenue                               |                                      |                                 | 7,663,263.58        |
| Levelised cost of electricity                | 282,816,852.15                       | 0.06                            |                     |

**Table S3. Cost and Revenue generated as well as Levelised cost of Electricity for Micro turbine – (CHP system)**

Price of 1USD @ 500₦

|                                              | Item description                    | Estimated Unit cost | Estimated quantity |
|----------------------------------------------|-------------------------------------|---------------------|--------------------|
| Investment cost                              | Cryogenic equipment                 |                     | \$ 70,000.00       |
|                                              | CHP system (micro turbine engine)   | Price of USD @ 500# | \$ 16,640,000.00   |
|                                              | Land cost and site construction     |                     | \$ 30,000.00       |
|                                              | storage tank farm                   |                     | \$ 200,000.00      |
|                                              | labor (skilled and Unskilled)       | \$ 10,000.00        | \$ 2,000,000.00    |
|                                              | Stainless steel 9.6 m3 tanks        | \$ 2,000.00         | \$ 2,000,000.00    |
|                                              | Different sizes of connecting tubes | \$ 2.00             | \$ 200,000.00      |
|                                              | Different sizes of valves           | \$ 10.00            | \$ 1,000,000.00    |
|                                              |                                     |                     |                    |
| Total Investment cost                        |                                     |                     | \$ 21,140,000.00   |
| Annual O & M for AD                          |                                     |                     | \$ 87,500.00       |
| Annual Operating and maintenance cost of CHP |                                     |                     | \$ 367,661.91      |
| Total cost                                   |                                     |                     | \$ 21,595,161.91   |
| Salvage Cost                                 |                                     |                     | \$ 1,000,000.00    |
|                                              |                                     |                     |                    |
| Electricity sales                            | 28.28                               | \$ 1,357,673.18     |                    |
|                                              | (GWh/yr)                            | \$ 0.08 /kWh        |                    |
| Heat sales                                   | 130.85                              | \$ 6,631,084.45     |                    |
| Price of LPG @ 1.25/kg                       |                                     |                     |                    |
|                                              |                                     | \$ 0.08 /kWh        |                    |
| Annual Revenue                               |                                     |                     | \$ 7,988,757.64    |
| Levelised cost of electricity \$             | 282,816,852.15                      | \$ 0.08             |                    |

**Table S4. Cost and Revenue generated as well as Levelised cost of Electricity for Gas turbine – (CHP system)**

Price of 1USD @ 500₦

|                                              | Item description                    | Estimated Unit cost | Estimated quantity |
|----------------------------------------------|-------------------------------------|---------------------|--------------------|
| Investment cost                              | Cryogenic equipment                 |                     | \$ 70,000.00       |
|                                              | CHP system (Gas turbine engine)     | Price of USD @ 500# | \$ 11,830,000.00   |
|                                              | Land cost and site construction     |                     | \$ 30,000.00       |
|                                              | storage tank farm                   |                     | \$ 200,000.00      |
|                                              | labor (skilled and Unskilled)       | \$ 20.00            | \$ 2,000,000.00    |
|                                              | Stainless steel 9.6 m3 tanks        | \$ 2,000.00         | \$ 2,000,000.00    |
|                                              | Different sizes of connecting tubes | \$ 2.00             | \$ 200,000.00      |
|                                              | Different sizes of valves           | \$ 10.00            | \$ 1,000,000.00    |
|                                              |                                     |                     |                    |
| Total Investment cost                        |                                     |                     | \$ 17,330,000.00   |
| Annual O & M for AD                          |                                     |                     | \$ 87,500.00       |
| Annual Operating and maintenance cost of CHP |                                     |                     | \$ 313,926.71      |
| Total cost                                   |                                     |                     | \$ 17,731,426.71   |
| Salvage Cost                                 |                                     |                     | \$ 1,000,000.00    |
|                                              |                                     |                     |                    |
| Electricity sales                            | \$ 28.28                            | \$ 1,118,533.83     |                    |
|                                              | (GWh/yr)                            | \$ 0.06 /kWh        |                    |
| Heat sales                                   | \$ 130.85                           | \$ 6,631,084.45     |                    |
|                                              |                                     |                     |                    |
|                                              | Price of LPG @ 1.25/kg              |                     |                    |
|                                              |                                     | \$ 0.08 /kWh        |                    |
| Annual Revenue                               |                                     |                     | \$ 7,749,618.28    |
| Levelised cost of electricity                | \$ 282,816,852.15                   | \$ 0.07             |                    |



**Table S5. Cost and Revenue generated as well as Levelised cost of Electricity for Fuel cell-CHP system**

Price of 1USD @ 500₦

|                                              | Item description                    | Estimated Unit cost       | Estimated quantity  |
|----------------------------------------------|-------------------------------------|---------------------------|---------------------|
| Investment cost                              | Cryogenic equipment                 |                           | \$<br>70,000.00     |
|                                              | CHP system (Gas turbine engine)     | Price of USD @ 500#       | \$<br>14,600,000.00 |
|                                              | Land cost and site construction     |                           | \$<br>30,000.00     |
|                                              | storage tank farm                   |                           | \$<br>200,000.00    |
|                                              | labor (skilled and Unskilled)       | \$<br>10,000.00           | \$<br>2,000,000.00  |
|                                              | Stainless steel 9.6 m3 tanks        | \$<br>2,000.00            | \$<br>2,000,000.00  |
|                                              | Different sizes of connecting tubes | \$<br>2.00                | \$<br>200,000.00    |
|                                              | Different sizes of valves           | \$<br>10.00               | \$<br>1,000,000.00  |
| Total Investment cost                        |                                     |                           | \$<br>20,100,000.00 |
| Annual O & M for AD                          |                                     |                           | \$<br>87,500.00     |
| Annual Operating and maintenance cost of CHP |                                     |                           | \$<br>1,131,267.41  |
| Total cost                                   |                                     |                           | \$<br>21,318,767.41 |
| Salvage Cost                                 |                                     |                           | \$<br>1,000,000.00  |
| Electricity sales                            | 28.28                               | \$<br>1,445,042.96        |                     |
|                                              | (GWh/yr)                            | \$<br>0.06                | /kWh                |
| Heat sales                                   | 130.85                              | \$<br>6,631,084.45        |                     |
|                                              |                                     | Price of LPG @ NGN1.25/kg |                     |
|                                              |                                     | \$<br>0.08                | /kWh                |
| Annual Revenue                               |                                     |                           | \$<br>8,076,127.41  |
| Levelised cost of electricity                | \$<br>282,816,852.15                | \$<br>0.09                |                     |

## IV

Table S6. Cash flow for Gas turbine

| Cash flow                      | Year | 0               | 1                 | 2                | 3                | 4               | 5               | 6               | 7               | 8               | 9               | 10              |
|--------------------------------|------|-----------------|-------------------|------------------|------------------|-----------------|-----------------|-----------------|-----------------|-----------------|-----------------|-----------------|
| Initial Investment             |      | \$17,330,000.00 |                   |                  |                  |                 |                 |                 |                 |                 |                 |                 |
| Operating and maintenance cost |      |                 | \$401,426.71      | \$401,426.71     | \$401,426.71     | \$01,426.71     | \$401,426.71    | \$401,426.71    | \$401,426.71    | \$401,426.71    | \$401,426.71    | \$401,426.71    |
| PV of Cash Outflow             |      | \$17,330,000.00 | \$313,614.61      | \$245,011.42     | \$191,415.17     | \$149,543.10    | \$116,830.55    | \$91,273.87     | \$71,307.71     | \$55,709.15     | \$43,522.77     | \$34,002.16     |
| Cumulative Cashflow            |      | \$17,330,000.00 | \$17,643,614.61   | \$17,888,626.03  | \$18,080,041.20  | \$18,229,584.30 | \$18,346,414.85 | \$18,437,688.72 | \$18,508,996.42 | \$18,564,705.57 | \$18,608,228.34 | \$18,642,230.50 |
| Net Annual Cashflow            |      |                 | \$(11,589,225.33) | \$(7,104,245.12) | \$(3,600,354.33) | \$(862,939.65)  | \$1,275,665.56  | \$2,946,450.89  | \$4,251,751.93  | \$5,271,518.36  | \$6,068,210.89  | \$6,690,626.93  |

| Column1                                  | Manual         | NPV Fx         |
|------------------------------------------|----------------|----------------|
| NPV of Project                           | \$6,798,001.11 | \$6,798,001.11 |
| IRR                                      | 41%            |                |
| ROI                                      | 36%            |                |
| Profitability index (Cost-Benefit ratio) | 1.39           |                |
| Payback period                           | 6.63           |                |

**Table S7. Cash flow for Microturbine**

| Cash outflow                   | Year | 0               | 1                 | 2                 | 3                | 4                | 5                | 6               | 7               | 8               | 9               | 10              |
|--------------------------------|------|-----------------|-------------------|-------------------|------------------|------------------|------------------|-----------------|-----------------|-----------------|-----------------|-----------------|
| Initial Investment             |      | \$21,140,000.00 |                   |                   |                  |                  |                  |                 |                 |                 |                 |                 |
| Operating and maintenance cost |      |                 | \$455,161.91      | \$455,161.91      | \$455,161.91     | \$455,161.91     | \$455,161.91     | \$455,161.91    | \$455,161.91    | \$455,161.91    | \$455,161.91    | \$455,161.91    |
| PV of Cash Outflow             |      | \$21,140,000.00 | \$355,595.24      | \$277,808.78      | \$217,038.11     | \$169,561.02     | \$132,469.55     | \$103,491.84    | \$80,853.00     | \$63,166.40     | \$49,348.75     | \$38,553.71     |
| Cummulative Cashflow           |      | \$21,140,000.00 | \$21,495,595.24   | \$21,773,404.02   | \$21,990,442.13  | \$22,160,003.16  | \$22,292,472.71  | \$22,395,964.54 | \$22,476,817.54 | \$22,539,983.94 | \$22,589,332.70 | \$22,627,886.41 |
| Net cashflow                   |      |                 | \$(15,254,378.34) | \$(10,656,236.41) | \$(7,063,938.03) | \$(4,257,454.93) | \$(2,064,890.00) | \$(351,948.65)  | \$986,286.78    | \$2,031,783.21  | \$2,848,577.30  | \$3,486,697.68  |

)

| Column1                                  | Manual         | NPV Fx         |
|------------------------------------------|----------------|----------------|
| NPV of Project                           | \$3,594,071.86 | \$3,594,071.86 |
| IRR                                      | 34%            |                |
| ROI                                      | 16%            |                |
| Profitability index (Cost-Benefit ratio) | 1.17           |                |
| Payback period                           | 8.09           |                |

**Table S8. Cash flow for Reciprocating Internal Combustion turbine**

[illegible]

**Table S9.** Cash flow For Fuel Cell[illegible]
